# Supplementary material
Source: MDPI journal article supplement (https://www.mdpi.com/2073-4344/9/6/545)
Supplement: s1 [file s1]

# Porosity Design of Shaped Zeolites for Improved Catalyst Lifetime in the Methanol-to-Hydrocarbons Reaction

Rogéria Bingre <sup>1</sup>, Renna Li <sup>2</sup>, Qiang Wang <sup>2</sup>, Patrick Nguyen <sup>3</sup>, Thomas Onfroy <sup>4</sup> and Benoît Louis <sup>1,\*</sup>

<sup>1</sup> ICPEES—Institut de Chimie et Procédés pour l’Energie, l’Environnement et la Santé, Energy and Fuels for a Sustainable Environment Team, UMR 7515 CNRS—Université de Strasbourg—ECPM, 25 rue Becquerel, F-67087 Strasbourg CEDEX 2, France

<sup>2</sup> EFN—Environmental Functional Nanomaterials Lab, College of Environmental Science and Engineering, Beijing Forestry University, P.O. Box 60, 35 Qinghua East Road, Haidian District, Beijing 100083, China

<sup>3</sup> Saint-Gobain C.R.E.E., 550 Avenue Alphonse Jauffret, BP 224, 84306 Cavaillon CEDEX, France

<sup>4</sup> Sorbonne Université, CNRS, Laboratoire de Réactivité de Surface (LRS), F-75005 Paris, France

\* Correspondence: blouis@unistra.fr; Tel.: +33-368-852-766

Received: 24 May 2019; Accepted: 16 June 2019; Published: 18 June 2019

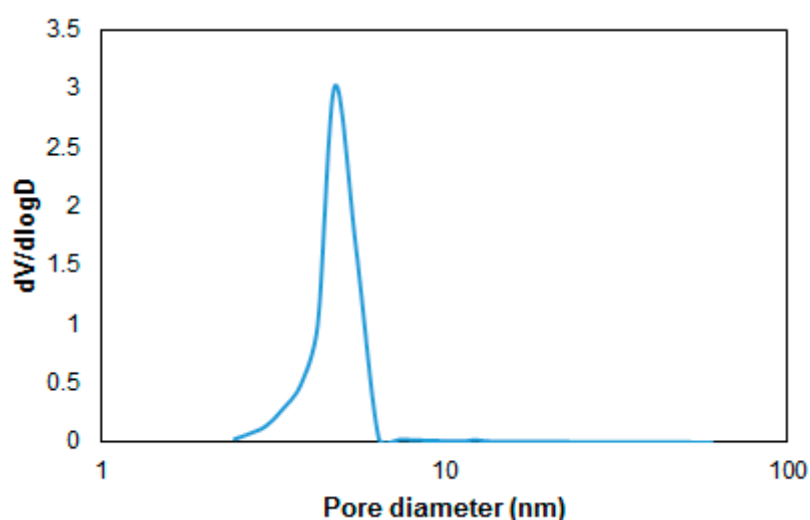

**Figure S1:** Pore size distribution of boeh\_ext obtained by BJH method.

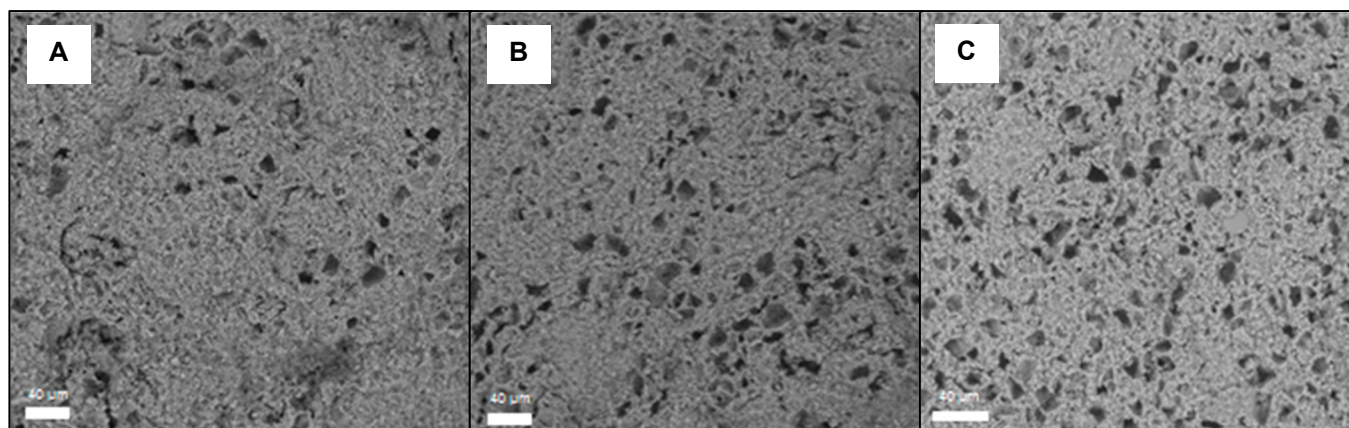

**Figure S2:** SEM images of the samples with different quantities of PA1: (a) Catal\_5PA1; (b) Catal\_10PA1; (c) Catal\_20PA1.

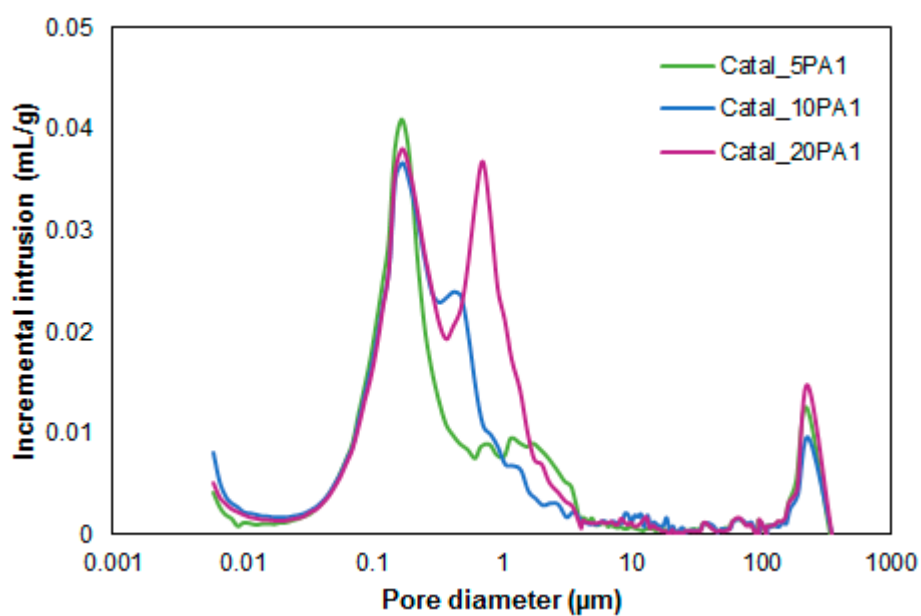

**Figure S3:** Pore profile of the samples with different quantities of PA1 obtained by mercury intrusion porosimetry.

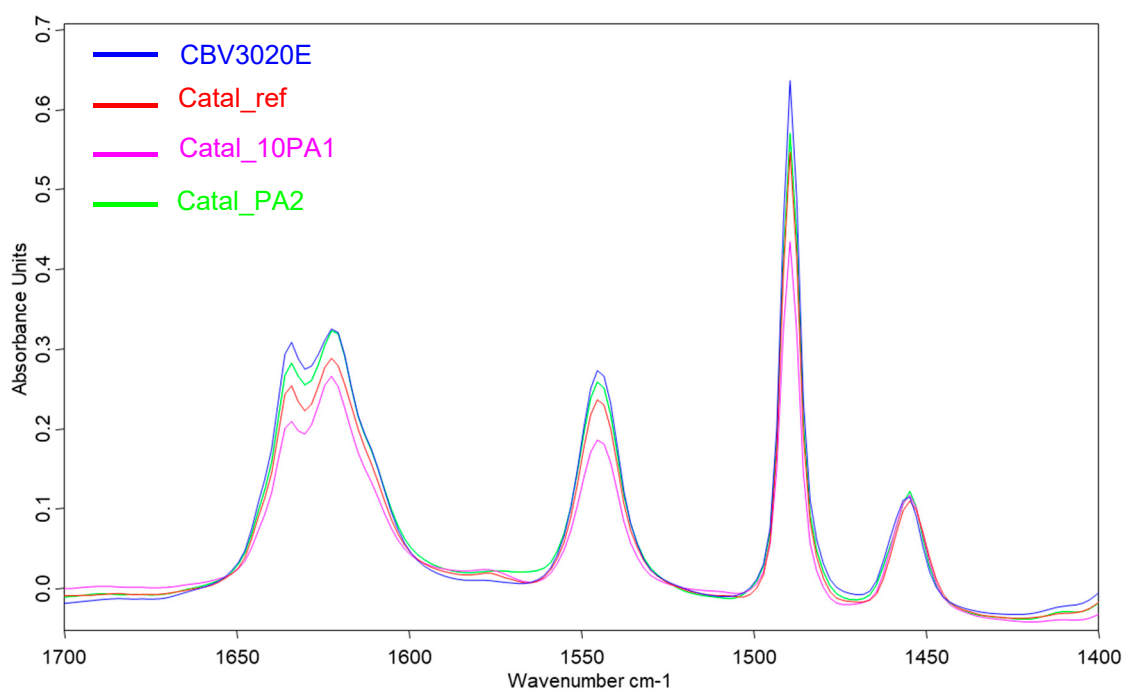

**Figure S4:** Spectra of pyridine adsorption followed by FTIR after desorption at 150 °C.

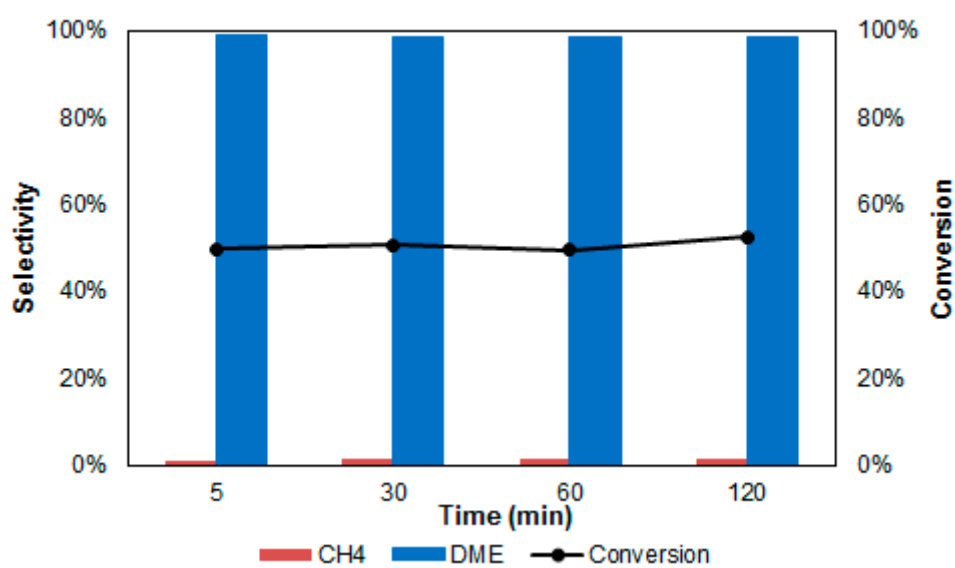

**Figure S5:** Catalytic activity of boeh\_ext: conversion of methanol and selectivity in methane and dimethyl ether.
